# Supplementary material for: Safety and efficacy of peripheral nerve blocks to treat refractory headaches after aneurysmal subarachnoid hemorrhage – A pilot observational study
Source: PubMed Central journal article supplement (PMC10158792; doi:10.3389/fneur.2023.1122384), 2023-04-20
Supplement: Image_1.pdf [file Image_1.pdf]

### Supplementary Figure

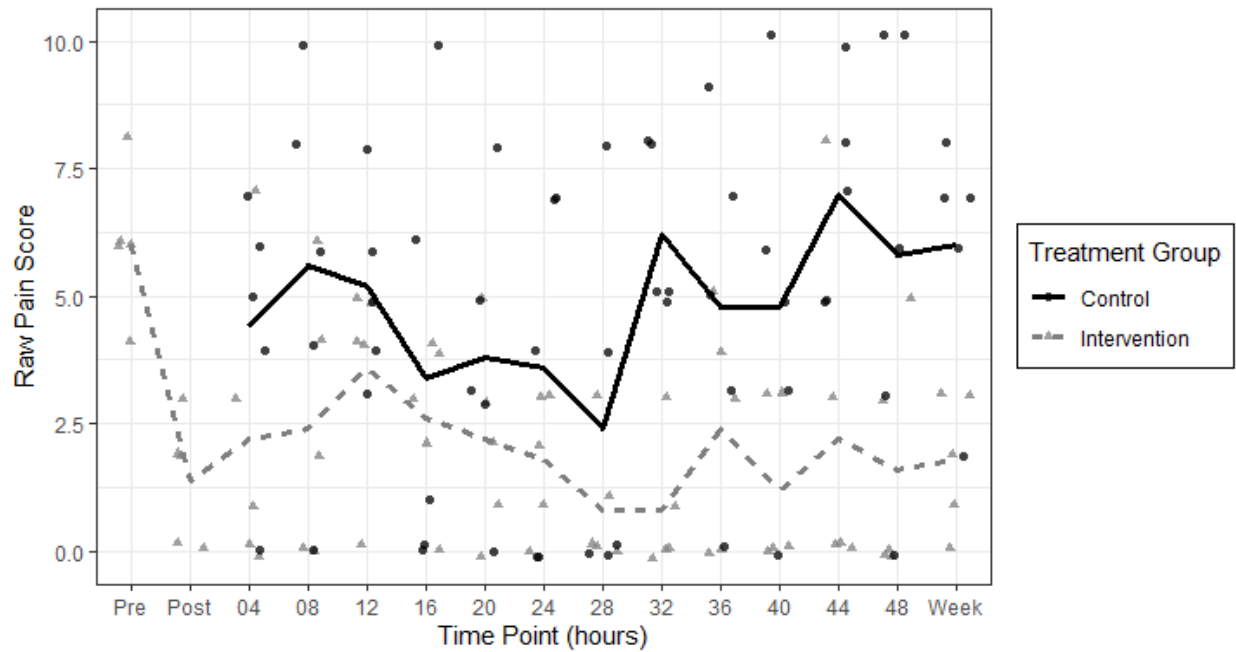

Scatterplot of raw NPRS pain scores in the control medication-only (circles) and interventional peripheral nerve block (triangles) groups are shown over a period of 48 hours and on one week follow up. A solid line shows the mean pain scores of the control group, and a dashed line shows the mean pain scores of the interventional group.
